# Supplementary material
Source: PubMed Central journal article supplement (PMC2825410)
Supplement: supp_M109.088708_Ohashi_JBC_M109_088708_0702_sup_files.pdf [file supp_M109.088708_Ohashi_JBC_M109_088708_0702_sup_files.pdf]

**Supplemental Table 1.** Primers used in RT-PCR protocols.

| Mouse Primers       |         | Sequence                      |
|---------------------|---------|-------------------------------|
| 36B4                | forward | 5'-GCTCCAAGCAGATGCAGCA-3'     |
|                     | reverse | 5'-CCGGATGTGAGGCAGCAG-3'      |
| $\beta$ -actin      | forward | 5'-CTAAGGCCAACCGTGAAAAG-3'    |
|                     | reverse | 5'-GGTACGACCAGAGGCATACA-3'    |
| Arginase-1          | forward | 5'-TGGCTTGCGAGACGTAGAC-3'     |
|                     | reverse | 5'-GCTCAGGTGAATCGGCCTTTT-3'   |
| IL-10               | forward | 5'-GCTCTTACTGACTGGCATGAG -3'  |
|                     | reverse | 5'-CGCAGCTCTAGGAGCATGTG -3'   |
| Mgl-1               | forward | 5'-TGAGAAAGGCTTTAAGAAGTGGG-3' |
|                     | reverse | 5'-GACCACCTGTAGTGATGTGGG-3'   |
| Chi3l3              | forward | 5'-AGAAGGGAGTTTCAAACCTGGT-3'  |
|                     | reverse | 5'-GTCTTGCTCATGTGTGTAAGTGA-3' |
| TNF- $\alpha$       | reverse | 5'-CGGAGTCCGGGCAGGT-3'        |
|                     | reverse | 5'-GCTGGGTAGAGAATGGATGAACA-3' |
| MCP-1               | forward | 5'-CAGCCAGATGCAGTTAACGC-3'    |
|                     | reverse | 5'-GCCTACTCATTGGGATCATCTTG-3' |
| IL-6                | forward | 5'-CTTCCATCCAGTTGCCTTCTTG-3'  |
|                     | reverse | 5'-AATTAAGCCTCCGACTTGTGAAG-3' |
| iNOS                | forward | 5'-CCAAGCCCTCACCTACTTCC-3'    |
|                     | reverse | 5'-CTCTGAGGGCTGACACAAGG-3'    |
| P47 <sup>phox</sup> | forward | 5'-GATGTTCCCCATTGAGGCCG-3'    |
|                     | reverse | 5'-GTTTCAGGTCATCAGGCCGC -3'   |
| P22 <sup>phox</sup> | forward | 5'-GTCCACCATGGAGCGATGTG-3'    |
|                     | reverse | 5'-CAATGGCCAAGCAGACGGTC-3'    |
| P67 <sup>phox</sup> | forward | 5'-CTGGCTGAGGCCATCAGACT-3'    |
|                     | reverse | 5'-AGGCCACTGCAGAGTGCTTG-3'    |
| P40 <sup>phox</sup> | forward | 5'-GCCGCTATCGCCAGTTCTAC-3'    |
|                     | reverse | 5'-GCAGGCTCAGGAGGTTCTTC-3'    |
| PU-1                | forward | 5'-CCGCACACCATGTCCACAAC-3'    |
|                     | reverse | 5'-GGACGTGCATCTGTTCCAGC-3'    |

| Human Primers |         | Sequence                         |
|---------------|---------|----------------------------------|
| β-actin       | forward | 5'-ACGGGGTCACCCACACTGTGC-3'      |
|               | reverse | 5'-CTAGAAGCATTTCGCGGTGGACGATG-3' |
| Mannose-R     | forward | 5'-CAGCGGTTGGCAGTGGA-3'          |
|               | reverse | 5'-CAGCTGATGGACTTCCTGGTAAG-3'    |
| IL-10         | forward | 5'-GATCCAGTTTTACCTGGAGGA-3'      |
|               | reverse | 5'-CCTGAGGGTCTTCAGGTTCTC-3'      |
| CD163         | forward | 5'-TTGCCAGCAGTTAAATGTG-3'        |
|               | reverse | 5'-AGGACAGTGTTTGGGACTGG-3'       |
| TNF-α         | forward | 5'-CGAGTGACAAGCCTGTAGC-3'        |
|               | reverse | 5'-GGTGTGGGTGAGGAGCACAT-3'       |
| MCP-1         | forward | 5'-CGACATCCTGGAAGTCCCTACC-3'     |
|               | reverse | 5'-CACTGTGCCGCTCTCGTTCAC-3'      |

Mgl-1: Macrophage galactose N-acetyl-galactosamine specific lectin-1, Chi3l3: chitinase 3-like 3, TNF-α: Tumor necrosis factor-α, MCP-1: Monocyte chemoattractant protein-1, Mannose-R: Mannose receptor.

# Supplemental Figure

**A**

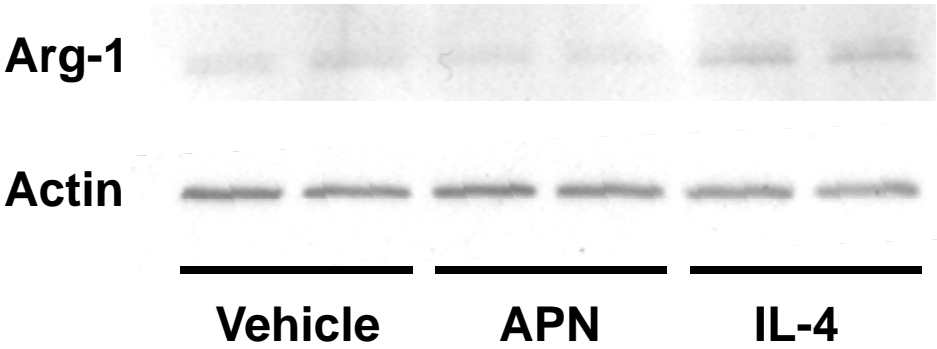

**B**

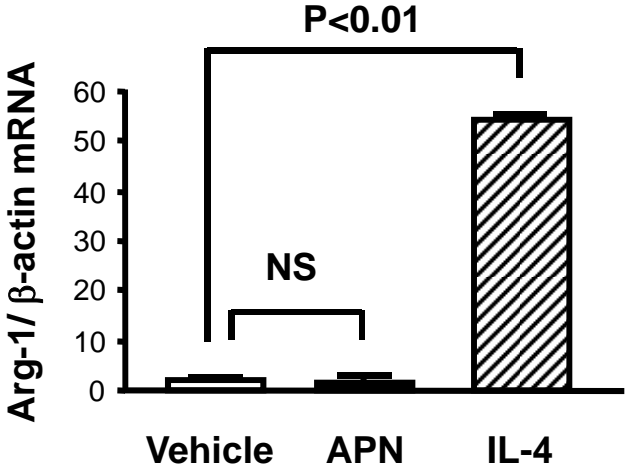

## Supplemental Figure Legend

### **Adiponectin does not increase arginase-1 expression in primary murine alveolar macrophages.**

Alveolar macrophages were isolated from wild-type mice by bronchoalveolar lavage using previously described methods (1). Cells were treated with recombinant adiponectin (30  $\mu\text{g}/\text{mL}$ ) or IL-4 (10  $\text{ng}/\text{mL}$ ) protein for 48 hours. Arginase-1 (Arg-1) expression was evaluated by Western blot (A) and quantitative RT-PCR (B) relative to  $\beta$ -actin.

1. Summer, R., Little, F. F., Ouchi, N., Takemura, Y., Aprahamian, T., Dwyer, D., Fitzsimmons, K., Suki, B., Parameswaran, H., Fine, A., and Walsh, K. (2008) *Am J Physiol Lung Cell Mol Physiol* **294**, L1035-1042
